# Supplementary material for: PD-1 blockade plus capecitabine as curative-intent treatment for tumor mutational burden-high multi-metastatic pancreatic ductal adenocarcinoma: A case report
Source: Research Square preprint supplement (doi:10.21203/rs.3.rs-7202690/v1), 2025-09-03
Supplement: Supplementary file 1 [file 26deca5f22672078000b482c.pdf]

# Data of Genetic Testing

## Supplementary 808 tumor related hot spot genes

### Point mutation/insertion deletion

|          |          |           |              |          |          |           |          |          |
|----------|----------|-----------|--------------|----------|----------|-----------|----------|----------|
| ABCB1    | ABCC1    | ABCC2     | ABCC3        | ABCC6    | ABCC9    | ABCG2     | ABL1     | ABL2     |
| ACTB     | ACTG1    | ACVR1     | ACVR1B       | ACVR2A   | ADAMTS12 | ADGRA2    | ADGRG4   | ADH1C    |
| AGO2     | AKT1     | AKT2      | AKT3         | ALDOC    | ALK      | ALOX12B   | AMER1    | AMOT     |
| ANK2     | ANKRD11  | APC       | APCDD1       | APOB     | APOE     | AR        | ARAF     | ARFRP1   |
| ARID1A   | ARID1B   | ARID2     | ARID5B       | ASB18    | ASTN1    | ASTN2     | ASXL1    | ASXL2    |
| ASXL3    | ATIC     | ATM       | ATP7A        | ATR      | ATRIP    | ATRX      | AURKA    | AURKB    |
| AXIN1    | AXIN2    | AXL       | B2M          | BABAM1   | BACH1    | BAP1      | BARD1    | BBC3     |
| BCL10    | BCL2     | BCL2L1    | BCL2L11      | BCL2L2   | BCL6     | BCOR      | BCORL1   | BCR      |
| BIRC3    | BLM      | BMPR1A    | BORCS8-MEF2B | BRAF     | BRCA1    | BRCA2     | BRD4     | BRINP3   |
| BRIP1    | BTG1     | BTBK      | C14orf177    | C6orf118 | CA10     | CALR      | CARD11   | CARM1    |
| CASP7    | CASP8    | CBBF      | CBL          | CBR1     | CBR3     | CCDC6     | CCND1    | CCND2    |
| CCND3    | CCNE1    | CD274     | CD276        | CD74     | CD79A    | CD79B     | CDA      | CDC42    |
| CDC73    | CDH1     | CDH10     | CDH12        | CDH18    | CDH9     | CDK12     | CDK4     | CDK6     |
| CDK8     | CDKN1A   | CDKN1B    | CDKN2A       | CDKN2B   | CDKN2C   | CEBPA     | CENPA    | CFTR     |
| CHD2     | CHD4     | CHEK1     | CHEK2        | CHRM2    | CHST3    | CHUK      | CIC      | CNTNAP2  |
| CNTNAP5  | COL22A1  | CRBN      | CREBBP       | CRKL     | CRLF2    | CSDE1     | CSF1R    | CSF3R    |
| CSMD3    | CTCF     | CTLA4     | CTNNA1       | CTNNA2   | CTNNB1   | CUL3      | CUL4A    | CUL4B    |
| CXCR4    | CYBA     | CYLD      | CYP17A1      | CYP2B6   | CYP2C19  | CYP2C8    | CYP2C9   | CYP2D6   |
| CYP2E1   | CYP3A4   | CYSLTR2   | DAXX         | DCAF12L1 | DCAF12L2 | DCAF4L2   | DCK      | DCLRE1C  |
| DCUN1D1  | DDB1     | DDR2      | DICER1       | DIS3     | DMD      | DNAJB1    | DNMT1    | DNMT3A   |
| DNMT3B   | DOT1L    | DPYD      | DROSHA       | DUSP27   | DUSP4    | E2F3      | EED      | EGF      |
| EGFL7    | EGFR     | EIF1AX    | EIF4A2       | EIF4E    | ELF3     | EML4      | EMSY     | ENG      |
| EP300    | EPAS1    | EPCAM     | EPHA2        | EPHA3    | EPHA5    | EPHA7     | EPHB1    | EPHX1    |
| ERBB2    | ERBB3    | ERBB4     | ERCC1        | ERCC2    | ERCC3    | ERCC4     | ERCC5    | ERF      |
| ERG      | ERICH3   | ERRF1     | ESR1         | ESR2     | ETV1     | ETV4      | ETV5     | ETV6     |
| EWSR1    | EZH1     | EZH2      | EZR          | F3       | FAM135B  | FAM175A   | FAM46C   | FAM58A   |
| FANCA    | FANCB    | FANCC     | FANCD2       | FANCE    | FANCF    | FANCG     | FANC     | FANCL    |
| FANCM    | FAS      | FAT1      | FAT3         | FBN2     | FBXL7    | FBXW7     | FCGR3A   | FES      |
| FGD1     | FGF10    | FGF12     | FGF14        | FGF19    | FGF23    | FGF3      | FGF4     | FGF6     |
| FGF7     | FGFR1    | FGFR2     | FGFR3        | FGFR4    | FH       | FIP1L1    | FLCN     | FLT1     |
| FLT3     | FLT4     | FOLR3     | FOXA1        | FOXL2    | FOXO1    | FOXP1     | FRK      | FRS2     |
| FRYL     | FUBP1    | FYN       | G6PC3        | GABRA2   | GABRA6   | GALNT12   | GAPDH    | GAST     |
| GATA1    | GATA2    | GATA3     | GATA4        | GATA6    | GEN1     | GGH       | GID4     | GLI1     |
| GNA11    | GNA13    | GNAQ      | GNAS         | GOPC     | GPR158   | GPS2      | GREM1    | GRID1    |
| GRIK3    | GRIN2A   | GRM3      | GRM8         | GSK3B    | GSTA1    | GSTM1     | GSTM3    | GSTP1    |
| GSTT1    | H3F3A    | H3F3AP4   | H3F3B        | H3F3C    | HAPLN1   | HCN1      | HDAC9    | HFE      |
| HGF      | HIST1H1C | HIST1H2BD | HIST1H3A     | HIST1H3B | HIST1H3C | HIST1H3D  | HIST1H3E | HIST1H3F |
| HIST1H3G | HIST1H3H | HIST1H3I  | HIST1H3J     | HIST2H3A | HIST2H3C | HIST2H3D  | HIST3H3  | HLA-A    |
| HLA-B    | HNF1A    | HOXB13    | HRAS         | HSD3B1   | HSP90AA1 | HTR1A     | ICOSLG   | ID3      |
| IDH1     | IDH2     | IFNGR1    | IFNL3        | IGF1     | IGF1R    | IGF2      | IGFL3    | IKBKE    |
| IKZF1    | IL10     | IL7R      | INHA         | INHBA    | INPP4A   | INPP4B    | INPPL1   | INSR     |
| INSRR    | IQCJ     | IRF2      | IRF4         | IRS1     | IRS2     | ITPA      | JAK1     | JAK2     |
| JAK3     | JUN      | KAT6A     | KCNA4        | KCND2    | KCNJ3    | KCNT2     | KDM5A    | KDM5C    |
| KDM6A    | KDR      | KEAP1     | KEL          | KIF2B    | KIF5B    | KIT       | KLC1     | KLF4     |
| KLHL1    | KLHL6    | KMT2A     | KMT2B        | KMT2C    | KMT2D    | KMT5A     | KNSTRN   | KRAS     |
| LATS1    | LATS2    | LEPR      | LIG3         | LIG4     | LMO1     | LOC349160 | LPL      | LPPR4    |
| LRFN5    | LRIG3    | LRP1B     | LRRRC4C      | LRRRIQ3  | LRRK2    | LRRTM4    | LTK      | LYN      |

|         |          |          |         |           |         |          |         |         |
|---------|----------|----------|---------|-----------|---------|----------|---------|---------|
| LZTR1   | MAD1L1   | MAGI2    | MALT1   | MAP2K1    | MAP2K2  | MAP2K4   | MAP3K1  | MAP3K13 |
| MAP3K14 | MAP4K3   | MAPK1    | MAPK3   | MAPKAP1   | MAX     | MBD4     | MCL1    | MDC1    |
| MDH2    | MDM2     | MDM4     | MED12   | MEF2B     | MEN1    | MET      | MGA     | MITF    |
| MKRN3   | MLH1     | MLH3     | MNAT1   | MOCS2     | MPL     | MRE11A   | MS4A3   | MSH2    |
| MSH3    | MSH6     | MSI1     | MSI2    | MST1      | MST1R   | MTHFD1   | MTHFR   | MTOR    |
| MUTYH   | MYB      | MYC      | MYCL    | MYCN      | MYD88   | MYOD1    | NAT2    | NAV3    |
| NBN     | NCAM1    | NCOA3    | NCOA4   | NCOR1     | NEGR1   | NEIL1    | NEIL3   | NF1     |
| NF2     | NFE2L2   | NFKBIA   | NKX2-1  | NKX3-1    | NLRP3   | NLRP5    | NOS3    | NOTCH1  |
| NOTCH2  | NOTCH3   | NOTCH4   | NPM1    | NQO1      | NRAS    | NSD1     | NTHL1   | NTM     |
| NTRK1   | NTRK2    | NTRK3    | NUF2    | NUP93     | NUTM1   | PAK1     | PAK3    | PAK6    |
| PAK7    | PALB2    | PALLD    | PAPPA2  | PARK2     | PARP1   | PARP2    | PARP3   | PARP4   |
| PAX5    | PAX8     | PBRM1    | PCDH10  | PCDH17    | PDCD1   | PDCD1LG2 | PDGFRA  | PDGFRB  |
| PDHA2   | PKD1     | PDPK1    | PDYN    | PDZRN3    | PER1    | PGR      | PHOX2B  | PIK3C2B |
| PIK3C2G | PIK3C3   | PIK3CA   | PIK3CB  | PIK3CD    | PIK3CG  | PIK3R1   | PIK3R2  | PIK3R3  |
| PIM1    | PIP5K1A  | PLCG2    | PLK2    | PMAIP1    | PML     | PMS1     | PMS2    | PNRC1   |
| POLD1   | POLDIP2  | POLE     | POLM    | POM121L12 | PPARD   | PPARG    | PPM1D   | PPP2R1A |
| PPP4R2  | PPP6C    | PRDM1    | PRDM14  | PREX2     | PRIM2   | PRKACA   | PRKAR1A | PRKCI   |
| PRKD1   | PRKDC    | PRSS1    | PRSS8   | PTCH1     | PTEN    | PTP4A1   | PTPN11  | PTPRD   |
| PTPRS   | PTPRT    | PXDNL    | QKI     | RAB35     | RAC1    | RAC2     | RAD21   | RAD50   |
| RAD51   | RAD51B   | RAD51C   | RAD51D  | RAD52     | RAD54L  | RAF1     | RANBP2  | RARA    |
| RASA1   | RB1      | RBBP8    | RBM10   | RECQL     | RECQL4  | REG3A    | REL     | RET     |
| REV1    | REV3L    | RFWD2    | RHBDF2  | RHEB      | RHOA    | RICTOR   | RINT1   | RIT1    |
| RNF43   | ROCK1    | ROS1     | RP1L1   | RPA1      | RPL11   | RPL35A   | RPL5    | RPP30   |
| RPS10   | RPS17    | RPS19    | RPS24   | RPS26     | RPS6KA4 | RPS6KB2  | RPS7    | RPTOR   |
| RRAGC   | RRAS     | RRAS2    | RRM1    | RRM2      | RTEL1   | RUNX1    | RUNX1T1 | RXRA    |
| RYBP    | RYR2     | SALL1    | SDC4    | SDHA      | SDHAF2  | SDHB     | SDHC    | SDHD    |
| SESN1   | SESN2    | SESN3    | SETBP1  | SETD2     | SETMAR  | SF3B1    | SH2B3   | SH2D1A  |
| SHMT1   | SHOC2    | SHQ1     | SLC14A2 | SLC19A1   | SLC22A2 | SLC22A4  | SLC34A2 | SLC45A2 |
| SLC8A1  | SLCO1B1  | SLCO1B3  | SLIT2   | SLIT3     | SLITRK1 | SLITRK2  | SLITRK3 | SLX4    |
| SMAD2   | SMAD3    | SMAD4    | SMARCA4 | SMARCB1   | SMARCD1 | SMO      | SMYD3   | SNCAIP  |
| SOCS1   | SOS1     | SOX10    | SOX17   | SOX2      | SOX9    | SPEN     | SPG7    | SPHKAP  |
| SPINK1  | SPOP     | SPRED1   | SPTA1   | SRC       | SRSF2   | ST6GAL2  | STAG2   | STAT3   |
| STAT4   | STAT5A   | STAT5B   | STK11   | STK19     | STK40   | STT3A    | SUFU    | SUZ12   |
| SYK     | TAF1     | TAP1     | TAP2    | TBP       | TBX3    | TCEB1    | TCF3    | TCF7L2  |
| TDG     | TEK      | TEKT4    | TERC    | TERT      | TET1    | TET2     | TFE3    | TFEB    |
| TG      | TGFB1    | TGFBR1   | TGFBR2  | TGFBR3    | TIPARP  | TLR4     | TMEM127 | TMPRSS2 |
| TNFAIP3 | TNFRSF14 | TNFRSF17 | TOP1    | TOP2A     | TOPBP1  | TP53     | TP53BP1 | TP63    |
| TPM3    | TPMT     | TRAF2    | TRAF7   | TRIM58    | TRPC5   | TRRAP    | TSC1    | TSC2    |
| TSHR    | TSHZ3    | TYK2     | TYMP    | TYMS      | U2AF1   | UGT1A1   | UGT1A8  | UPF1    |
| USP1    | VEGFA    | VHL      | VTGN1   | WHSC1     | WHSC1L1 | WISP3    | WRN     | WT1     |
| WWTR1   | XIAP     | XIRP2    | XPO1    | XRCC1     | XRCC2   | XRCC3    | YAP1    | YES1    |
| ZAN     | ZBTB2    | ZFHX3    | ZFHX4   | ZIC1      | ZIC4    | ZIM2     | ZNF217  | ZNF423  |
| ZNF521  | ZNF536   | ZNF703   | ZNF804A | ZNF804B   | ZNF831  | ZRSR2    |         |         |

| Copy number variation |          |        |          |         |        |         |        |         |
|-----------------------|----------|--------|----------|---------|--------|---------|--------|---------|
| ACVR1B                | AKT1     | AKT2   | AKT3     | ALK     | AMER1  | APC     | AR     | ARAF    |
| ARID1A                | ARID1B   | ARID2  | ASXL1    | ATM     | ATR    | ATRX    | AURKA  | AXIN1   |
| B2M                   | BAP1     | BCL2   | BCOR     | BCL2L11 | BRAF   | BRCA1   | BRCA2  | BRD4    |
| BTK                   | CALR     | CARD11 | CASP8    | CBL     | CCND1  | CCND2   | CCNE1  | CCND3   |
| CD274                 | CDC73    | CDH1   | CDK12    | CDK4    | CDK6   | CDKN1A  | CDKN1B | CDKN2A  |
| CDKN2B                | CDKN2C   | CEBPA  | CHEK2    | CIC     | CREBBP | CRLF2   | CSF1R  | CSF3R   |
| CTNNB1                | CYLD     | DAXX   | DDR2     | DNMT1   | DNMT3A | EGFR    | EP300  | EPAS1   |
| EPHA2                 | ERBB2    | ERBB3  | ERBB4    | ERCC4   | ESR1   | EZH2    | FANCA  | FANCC   |
| FBXW7                 | FGF3     | FGFR1  | FGFR2    | FGFR3   | FGFR4  | FLT1    | FLT3   | FOXL2   |
| FRK                   | FUBP1    | GATA1  | GATA2    | GATA3   | GNA11  | GNAQ    | GNAS   | H3F3A   |
| HGF                   | HIST1H3B | HNF1A  | HRAS     | IDH1    | IDH2   | IGF1R   | IKZF1  | IGF2    |
| IL7R                  | JAK1     | JAK2   | JAK3     | KDM5C   | KDM6A  | KDR     | KIT    | KLF4    |
| KRAS                  | LMO1     | LRP1B  | MAP2K1   | MAP2K2  | MAP2K4 | MAP3K1  | MAPK1  | MDM2    |
| MDM4                  | MED12    | MEN1   | MET      | MLH1    | MPL    | MSH2    | MSH6   | MTOR    |
| MYC                   | MYCL     | Mycn   | MYD88    | NCOA3   | NCOR1  | NF1     | NF2    | NFE2L2  |
| NKX2-1                | NOTCH1   | NOTCH2 | NPM1     | NRAS    | NTRK1  | NTRK2   | NTRK3  | PALB2   |
| PARP1                 | PAX5     | PBRM1  | PDCD1LG2 | PDGFRA  | PDGFRB | PGR     | PIK3CA | PIK3CB  |
| PIK3R1                | PIK3R2   | PLCG2  | PMS2     | POLD1   | POLE   | PPP2R1A | PRDM1  | PTCH1   |
| PTEN                  | PTPN11   | PTPRD  | RAC1     | RAD51   | RAF1   | RB1     | RICTOR | RIT1    |
| RNF43                 | ROCK1    | RUNX1  | SETBP1   | SETD2   | SF3B1  | SMAD2   | SMAD4  | SMARCA4 |
| SMARCB1               | SMO      | SOCS1  | SOX10    | SOX9    | SPOP   | SRSF2   | STAG2  | STK11   |
| SYK                   | TEK4     | TET2   | TNFAIP3  | TOP1    | TOP2A  | TP53    | TRAF7  | TSC1    |
| TSC2                  | TSHR     | TYK2   | U2AF1    | VEGFA   | VHL    | WT1     |        |         |

| Fusion mutation |       |        |      |      |       |       |        |       |
|-----------------|-------|--------|------|------|-------|-------|--------|-------|
| ABL1            | ALK   | AKT3   | BCL2 | BCR  | BRAF  | BRD4  | EGFR   | ERBB4 |
| ESR1            | ETV1  | ETV4   | ETV6 | ETV5 | EWSR1 | FGFR1 | FGFR3  | FGFR2 |
| JAK2            | KIT   | KMT2A  | MET  | MSH2 | MYB   | MYC   | NOTCH2 | NTRK1 |
| NTRK2           | NTRK3 | PDGFRA | RAF1 | RARA | RET   | ROS1  | TFE3   | TFEB  |
| TMPRSS2         |       |        |      |      |       |       |        |       |

| Genetic tumor germline variation |        |         |         |         |        |        |         |        |
|----------------------------------|--------|---------|---------|---------|--------|--------|---------|--------|
| ALK                              | APC    | ATM     | ATR     | AXIN2   | BAP1   | BARD1  | BLM     | BMPR1A |
| BRCA1                            | BRCA2  | BRIP1   | CASP8   | CDKN2A  | CDH1   | CDKN2B | CHEK2   | CTLA4  |
| ENG                              | EPAS1  | EPCAM   | FAM175A | FANCA   | FANCB  | FANCC  | FANCE   | FANCD2 |
| FANCG                            | FAS    | FH      | FLCN    | GALNT12 | GEN1   | GPC3   | GREM1   | HFE    |
| HNF1B                            | HOXB13 | KIT     | KRAS    | MAX     | MDH2   | MEN1   | MET     | MITF   |
| MLH1                             | MLH3   | MRE11A  | MSH2    | MSH3    | MSH6   | MUTYH  | NBN     | NF1    |
| NF2                              | NRAS   | NTHL1   | PALB2   | PALLD   | PBRM1  | PDGFRA | PHOX2B  | PMS2   |
| POLD1                            | POLE   | PRKAR1A | PRSS1   | PTCH1   | PTEN   | RAD50  | RAD51C  | RAD51D |
| RB1                              | RECQL4 | RET     | RHBDF2  | RINT1   | RPL11  | RPL35A | RPL5    | RPS10  |
| RPS17                            | RPS19  | RPS24   | RPS26   | RPS7    | SDHA   | SDHAF2 | SDHB    | SDHC   |
| SDHD                             | SLX4   | SMAD4   | SMARCA4 | SPINK1  | STK11  | TGFBR2 | TMEM127 | TP53   |
| TSC1                             | TSC2   | VHL     | WRN     | WT1     | XRCC2  | CDK12  | CDK4    | CHEK1  |
| EGFR                             | FANCI  | FANCL   | PPP2R2A | RAD51B  | RAD54L |        |         |        |

## Summary of test results

| Num | Item                            | Result      |
|-----|---------------------------------|-------------|
| 1   | Tumor mutation Burden,TMB       | 9.02 Mut/Mb |
| 2   | Micro Satellite Instability,MSI | MSS         |
| 3   | MLH1                            | -           |
| 4   | MSH2                            | -           |
| 5   | MSH6                            | -           |
| 6   | PMS2                            | -           |
| 7   | PD-L1 score                     | TPS: < 1%   |
| 8   | TET2                            | P.I1873L    |
| 9   | BRCA1                           | -           |
| 10  | BRCA2                           | -           |
